# Supplementary material for: The Impact of the COVID-19 Pandemic and Emergency Distance Teaching on the Psychological Status of University Teachers: A Cross-Sectional Study in Jordan
Source: PubMed Central journal article supplement (PMC7695050; doi:10.4269/ajtmh.20-0877), 2020-10-27
Supplement: tpmd200877.SD1.pdf [file tpmd200877.SD1.pdf]

## Supplementary Material

**Supplementary Table.** Results of Multiple Logistic Regression for the association between Motivation for Distance Teaching (recoded as binary outcome variable) and multiple predictor variables

| Predictors                    | Crude OR<br>(95% CI) | P-value | Adjusted OR<br>(95% CI) | P-value |
|-------------------------------|----------------------|---------|-------------------------|---------|
| <b>Age</b>                    |                      |         |                         |         |
| 25-34                         | <b>Reference</b>     |         |                         |         |
| 35-44                         | 0.81 (0.42-1.55)     | 0.523   | 0.61 (0.29-1.26)        | 0.181   |
| 45-54                         | 1.39 (0.67-2.89)     | 0.371   | 0.98 (0.41-2.32)        | 0.957   |
| 55-64                         | 1.17 (0.50-2.75)     | 0.718   | 0.87 (0.28-2.71)        | 0.808   |
| 65-75                         | 0.44 (0.12-1.64)     | 0.224   | 0.40 (0.07-2.26)        | 0.298   |
| <b>Gender</b>                 |                      |         |                         |         |
| Female                        | <b>Reference</b>     |         |                         |         |
| Male                          | 0.88 (0.56-1.39)     | 0.598   | 0.72 (0.43-1.20)        | 0.206   |
| <b>Academic Rank</b>          |                      |         |                         |         |
| Assistant.Prof                | <b>Reference</b>     |         |                         |         |
| Associate.Prof                | 1.09 (0.59-2.01)     | 0.788   | 0.96 (0.50-1.85)        | 0.907   |
| Full.Prof                     | 0.98 (0.53-1.84)     | 0.959   | 0.87 (0.38-1.99)        | 0.745   |
| Lecturer (MSc)                | 0.67 (0.36-1.24)     | 0.207   | 0.52 (0.26-1.03)        | 0.062   |
| <b>Scientific Discipline</b>  |                      |         |                         |         |
| Humanities                    | <b>Reference</b>     |         |                         |         |
| Medical                       | 0.80 (0.47-1.38)     | 0.423   | 0.78 (0.44-1.38)        | 0.388   |
| Sciences                      | 1.05 (0.57-1.91)     | 0.878   | 1.15 (0.61-2.16)        | 0.660   |
| <b>Duration of Experience</b> |                      |         |                         |         |
| 1-15 years                    | <b>Reference</b>     |         |                         |         |
| 16-35 years                   | 1.56 (0.85-2.85)     | 0.154   | 1.44 (0.65-3.17)        | 0.370   |
| 36-53 years                   | 0.66 (0.28-1.57)     | 0.344   | 0.73 (0.21-2.54)        | 0.623   |
